# Supplementary material for: The Carotenoid Diatoxanthin Modulates Inflammatory and Angiogenesis Pathways In Vitro in Prostate Cancer Cells
Source: MDPI journal article supplement (doi:10.3390/antiox12020359), 2023-02-02
Supplement: s1 [file s1]

**Table S1.** Fold regulation values of genes obtained from PCR array genes expression analysis.

| Gene<br>Symbol | Gene Name                                                      | Fold Regulation |       |           |
|----------------|----------------------------------------------------------------|-----------------|-------|-----------|
|                |                                                                | PC3             | DU145 | PNT2      |
| <i>ALB</i>     | Albumin                                                        | -5.90           | 1.01  | -2.85     |
| <i>ALOX</i>    | Arachidonate 12-lipoxygenase                                   | -1.17           | 5.79  | -32.08    |
| <i>AOX</i>     | Aldehyde oxidase 1                                             | -327.15         | 0.85  | 6.21      |
| <i>APOE</i>    | Apolipoprotein E                                               | -5.90           | 1.61  | -44.03    |
| <i>ATOX1</i>   | ATX1 antioxidant protein 1 homolog (yeast)                     | -33.60          | 0.80  | 1520.85   |
| <i>BNIP3</i>   | BCL2/adenovirus E1B 19kDa interacting protein3                 | -1.72           | 0.82  | 7.10      |
| <i>CAT</i>     | Catalase                                                       | 12.54           | 1.11  | -234.14   |
| <i>CCL5</i>    | Chemokine (C-C motif) ligand 5                                 | -3.93           | 1.04  | -2.37     |
| <i>CCS</i>     | Copper chaperone for superoxide dismutase                      | -40.60          | 1.42  | 12.08     |
| <i>CYBB</i>    | Cytochrome b-245, beta polypeptide                             | -3.04           | 1.78  | -555.50   |
| <i>CYGB</i>    | Cytoglobin                                                     | -22.67          | 7.28  | -7.30     |
| <i>DHCR24</i>  | 24-dehydrocholesterol reductase                                | -49.20          | 3.91  | 66.64     |
| <i>DUOX1</i>   | Dual oxidase 1                                                 | -123.73         | 2.92  | -1740.04  |
| <i>DUOX2</i>   | Dual oxidase 2                                                 | -10.80          | 5.75  | -691.86   |
| <i>DUSP1</i>   | Dual specificity phosphatase 1                                 | -1592.59        | 1.50  | 15.93     |
| <i>EPHX2</i>   | Epoxide hydrolase 2, cytoplasmic                               | -22.13          | 1.39  | -367.91   |
| <i>EPX</i>     | Eosinophil peroxidase                                          | -1.35           | 7.35  | -82.53    |
| <i>FOXM1</i>   | Forkhead box M1                                                | -514.00         | 1.64  | 1.91      |
| <i>FTH1</i>    | Ferritin, heavy polypeptide 1                                  | -26499.59       | 0.96  | 3778.05   |
| <i>GCLC</i>    | Glutamate-cysteine ligase, catalytic subunit                   | -1.28           | 0.80  | 54.19     |
| <i>GPX1</i>    | Glutathione peroxidase 1                                       | -54916.93       | 1.03  | 176.72    |
| <i>GPX2</i>    | Glutathione peroxidase 2 (gastrointestinal)                    | -5.55           | 1.41  | -56.74    |
| <i>GPX3</i>    | Glutathione peroxidase 3 (plasma)                              | -2.20           | 2.37  | -622.77   |
| <i>GPX4</i>    | Glutathione peroxidase 4 (phospholipid hydroperoxidase)        | -16.40          | 1.41  | 1.70      |
| <i>GPX5</i>    | Glutathione peroxidase 5 (epididymal androgen-related protein) | -4.79           | 3.63  | -10617.12 |
| <i>GSR</i>     | Glutathione reductase                                          | -3.95           | 17.30 | -42.72    |
| <i>GSS</i>     | Glutathione synthetase                                         | -2217.57        | 1.02  | 137.20    |
| <i>GSTP1</i>   | Glutathione S-transferase pi 1                                 | -279.77         | 0.93  | 1595.93   |
| <i>GSTZ1</i>   | Glutathione transferase zeta 1                                 | 12.54           | 0.96  | -229.56   |
| <i>HSPA1A</i>  | Heat shock 70kDa protein 1A                                    | 59.05           | 3.56  | -30.00    |
| <i>KRT1</i>    | Keratin 1                                                      | -5.90           | 0.91  | -41.11    |
| <i>LPO</i>     | Lactoperoxidase                                                | -5.90           | 0.02  | -24.06    |
| <i>MB</i>      | Myoglobin                                                      | -3.65           | 1.04  | -3.24     |
| <i>MBL2</i>    | Mannose-binding lectin (protein C) 2, soluble                  | 78.98           | 0.02  | -116.46   |
| <i>MPO</i>     | Myeloperoxidase                                                | 4429.08         | 0.77  | -34270.58 |
| <i>MPV</i>     | MpV17 mitochondrial inner membrane protein                     | -2616.80        | 1.10  | 9.39      |
| <i>MSRA</i>    | Methionine sulfoxide reductase A                               | 7.73            | 0.99  | 2.92      |
| <i>MT3</i>     | Metallothionein 3                                              | 29222.46        | 2.58  | -29920.91 |
| <i>NCF1</i>    | Neutrophil cytosolic factor 1                                  | -10.75          | 2.27  | 2.24      |
| <i>NCF2</i>    | Neutrophil cytosolic factor 2                                  | -1.01           | 1.63  | 1.65      |
| <i>NOS2</i>    | Nitric oxide synthase 2, inducible                             | -5.67           | 0.57  | -252.01   |

|                 |                                                                                                                                                  |           |        |           |
|-----------------|--------------------------------------------------------------------------------------------------------------------------------------------------|-----------|--------|-----------|
| <i>NOX4</i>     | NADPH oxidase 4                                                                                                                                  | 274.71    | 0.91   | -30911.60 |
| <i>NOX5</i>     | NADPH oxidase, EF-hand calcium binding domain 5                                                                                                  | 1.11      | 2.21   | -1.31     |
| <i>NUDT1</i>    | Nudix (nucleoside diphosphate linked moiety X)-type motif 1                                                                                      | -733.34   | 1.08   | 77.60     |
| <i>PDLIM1</i>   | PDZ and LIM domain 1                                                                                                                             | -442.55   | 0.83   | 18.36     |
| <i>PRDX1</i>    | Peroxiredoxin 1                                                                                                                                  | -13.16    | 1.09   | 325.23    |
| <i>PRDX2</i>    | Peroxiredoxin 2                                                                                                                                  | -34851.86 | 1.04   | 19.49     |
| <i>PRDX3</i>    | Peroxiredoxin 3                                                                                                                                  | -2.28     | 0.69   | 35.82     |
| <i>PRDX4</i>    | Peroxiredoxin 4                                                                                                                                  | -2.86     | 0.81   | 156.57    |
| <i>PRDX5</i>    | Peroxiredoxin 5                                                                                                                                  | -62.60    | 1.04   | 2.31      |
| <i>PRDX6</i>    | Peroxiredoxin 6                                                                                                                                  | -9.48     | 0.77   | 1.73      |
| <i>PRNP</i>     | Prion protein                                                                                                                                    | -65.64    | 0.85   | 3.48      |
| <i>PTGS1</i>    | Prostaglandin-endoperoxide synthase 1 (prostaglandin G/H synthase and cyclooxygenase)                                                            | -1.42     | 1.29   | -43.04    |
| <i>PTGS2</i>    | Prostaglandin-endoperoxide synthase 2 (prostaglandin G/H synthase and cyclooxygenase)                                                            | -7.28     | 2.32   | -2.63     |
| <i>RNF7</i>     | Ring finger protein 7                                                                                                                            | 1.62      | 0.58   | 1.55      |
| <i>VIMP</i>     | Selenoprotein S                                                                                                                                  | -40.87    | 0.64   | 1.93      |
| <i>SEPP1</i>    | Selenoprotein P, plasma, 1                                                                                                                       | -2.13     | 0.52   | -51.11    |
| <i>SFTPD</i>    | Surfactant protein D                                                                                                                             | 79.11     | 1.24   | -17.30    |
| <i>SIRT2</i>    | Sirtuin 2                                                                                                                                        | 608.29    | 4.23   | -4412.90  |
| <i>SOD1</i>     | Superoxide dismutase 1, soluble                                                                                                                  | 10.88     | 0.93   | -2.13     |
| <i>SOD2</i>     | Superoxide dismutase 2, mitochondrial                                                                                                            | -313.87   | 1.44   | 484.88    |
| <i>SOD3</i>     | Superoxide dismutase 3, extracellular                                                                                                            | -48.50    | 2.70   | -1.87     |
| <i>SQSTM1</i>   | Sequestosome 1                                                                                                                                   | -376.14   | 1.23   | 150.80    |
| <i>SRXN1</i>    | Sulfiredoxin 1                                                                                                                                   | 7.52      | 2.36   | -6.59     |
| <i>TPO</i>      | Thyroid peroxidase                                                                                                                               | 2.77      | 125.15 | -24.06    |
| <i>TTN</i>      | Titin                                                                                                                                            | 14.11     | 4.59   | -2924.12  |
| <i>TXNRD2</i>   | Thioredoxin reductase 2                                                                                                                          | 595.72    | 1.96   | -580.28   |
| <i>UCP2</i>     | Uncoupling protein 2 (mitochondrial, proton carrier)                                                                                             | -5.01     | 1.45   | -2.40     |
| <i>AKR1C2</i>   | Aldo-keto reductase family 1, member C2 (dihydrodiol dehydrogenase 2; bile acid binding protein; 3-alpha hydroxysteroid dehydrogenase, type III) | -1.27     | 1.12   | -19.04    |
| <i>BAG2</i>     | BCL2-associated athanogene 2                                                                                                                     | 17.33     | 0.68   | -146.77   |
| <i>FHL2</i>     | Four and a half LIM domains 2                                                                                                                    | 12.92     | 1.06   | 1.42      |
| <i>GCLM</i>     | Glutamate-cysteine ligase, modifier subunit                                                                                                      | -30.28    | 0.88   | 4.25      |
| <i>GLA</i>      | Galactosidase, alpha                                                                                                                             | -66.78    | 0.88   | -1.97     |
| <i>HMOX1</i>    | Heme oxygenase (decycling) 1                                                                                                                     | -68.47    | 1.07   | 5.04      |
| <i>HSP90AA1</i> | Heat shock protein 90kDa alpha (cytosolic), class A member 1                                                                                     | -14312.07 | 0.84   | 932.67    |
| <i>LHPP</i>     | Phospholysine phosphohistidine inorganic pyrophosphate phosphatase                                                                               | 9.91      | 1.01   | -6.82     |
| <i>NCOA7</i>    | Nuclear receptor coactivator 7                                                                                                                   | 121.44    | 1.63   | -338.55   |
| <i>NQO1</i>     | NAD(P)H dehydrogenase, quinone 1                                                                                                                 | -62.40    | 0.90   | 113.45    |

|                 |                                                                                             |        |      |        |
|-----------------|---------------------------------------------------------------------------------------------|--------|------|--------|
| <i>PTGR1</i>    | Prostaglandin reductase 1                                                                   | 2.67   | 0.97 | 5.73   |
| <i>SLC7A11</i>  | Solute carrier family 7 (anionic amino acid transporter light chain, xc- system), member 11 | 1.27   | 2.26 | -3.24  |
| <i>SPINK1</i>   | Serine peptidase inhibitor, Kazal type 1                                                    | -14.55 | 1.11 | -24.06 |
| <i>TRAPPC6A</i> | Trafficking protein particle complex 6A                                                     | -25.79 | 0.84 | 8.15   |
| <i>TXN</i>      | Thioredoxin                                                                                 | -17.89 | 0.72 | 582.92 |
| <i>TXNRD1</i>   | Thioredoxin reductase 1                                                                     | -5.90  | 0.87 | 69.26  |
