# Supplementary material for: The Carotenoid Diatoxanthin Modulates Inflammatory and Angiogenesis Pathways In Vitro in Prostate Cancer Cells
Source: MDPI journal article supplement (doi:10.3390/antiox12020359), 2023-02-02
Supplement: s1 [file s1]

**A****SFM**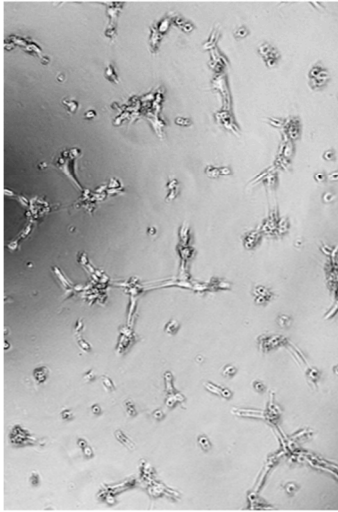**B****CM DU145**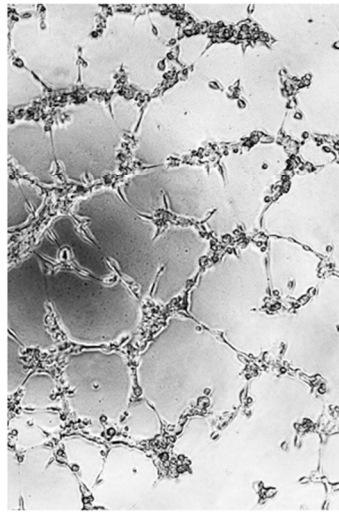**C****CM PC3**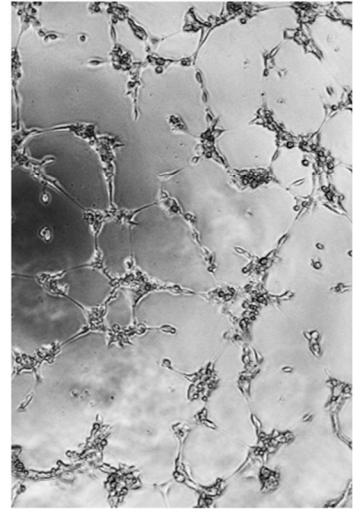

**Supplementary Figure S3.** Effects of on capillary-like structure formation of HUVECs by PCa supernatants. Morphogenesis assay on HUVECs pre-treated with 50  $\mu\text{g}/\text{mL}$  of CM collected from PCa cells following 24 h of treatment. Representative images of tubular structures with HUVEC exposed to (A) SFM, (B) CM from DU145 cells, (C) PC3 cells.
